# Supplementary material for: Vascular Dysfunction Induced in Offspring by Maternal Dietary Fat Involves Altered Arterial Polyunsaturated Fatty Acid Biosynthesis
Source: PLOS journal article supplement (doi:10.1371/journal.pone.0034492), 2012-04-03
Supplement: S1 (10.1371/journal.pone.0034492.s001) [file journal.pone.0034492.s001]

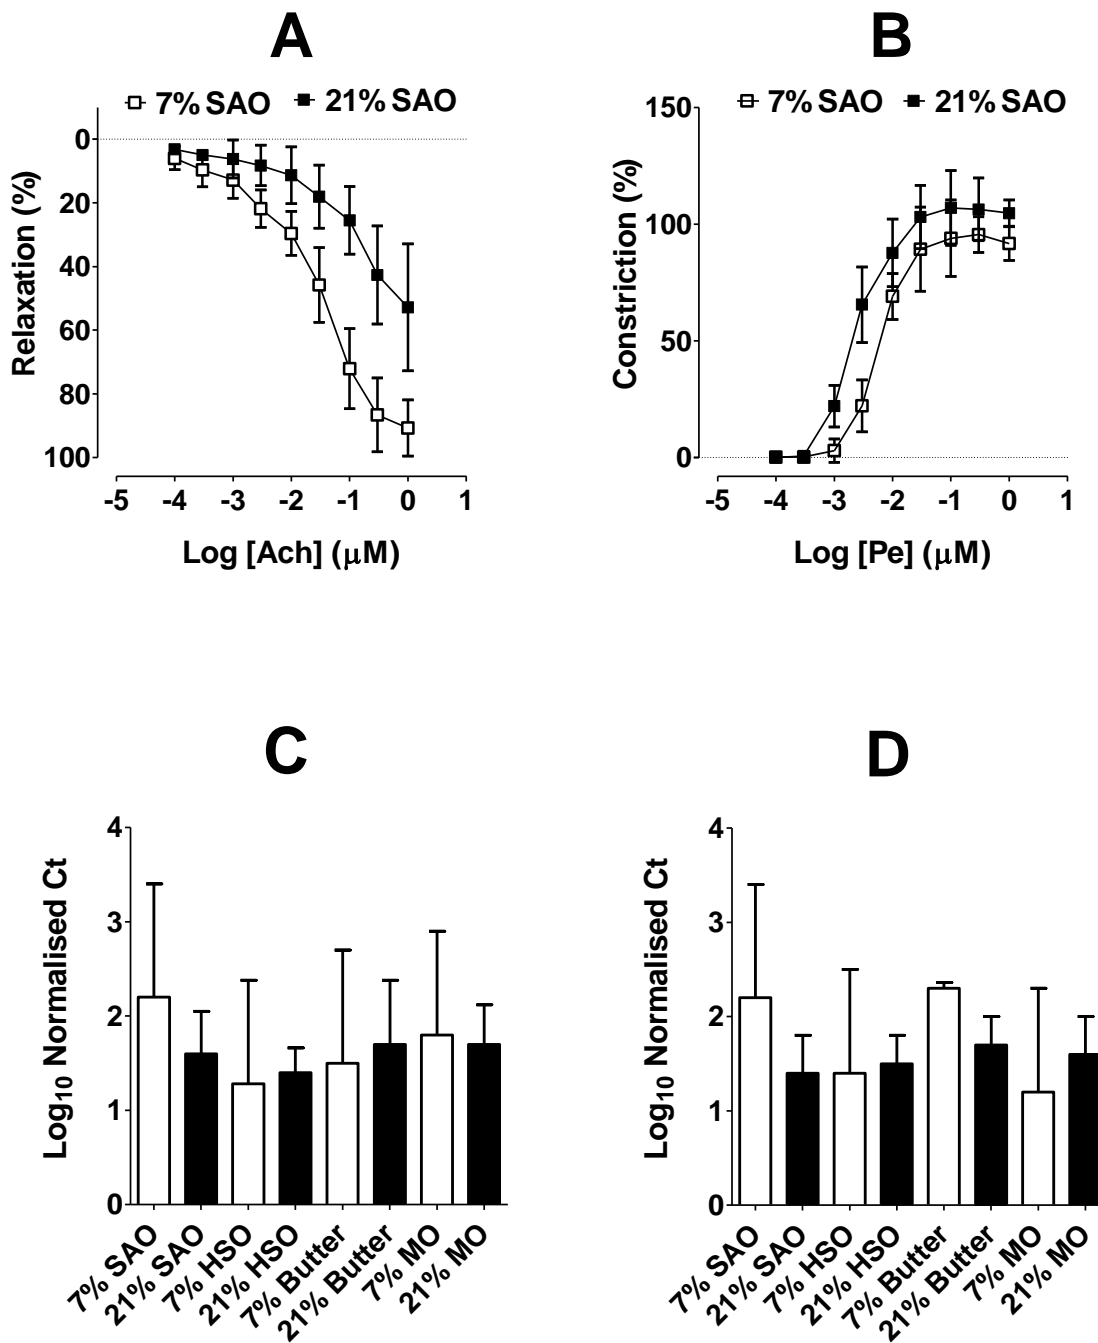

**Figure S1. Examples of the responses of male aortae to ACh and Pe and aortae *eNOS* mRNA expression.** (A) ACh-induced vaso-relaxation and (B) Pe-induced vasoconstriction in the aortae of male offspring of dams fed either 7% or 21% SAO. *eNOS* mRNA expression in (C) male and (D) female offspring aortae. Values are mean  $\pm$  SD ( $n = 6$  / group). For *eNOS* expression, statistical comparisons were by ANOVA with Tukey's *post hoc* analysis. There were no statistically significant differences between groups.
