# Supplementary material for: Vascular Dysfunction Induced in Offspring by Maternal Dietary Fat Involves Altered Arterial Polyunsaturated Fatty Acid Biosynthesis
Source: PLOS journal article supplement (doi:10.1371/journal.pone.0034492), 2012-04-03
Supplement: S2 (10.1371/journal.pone.0034492.s002) [file journal.pone.0034492.s002]

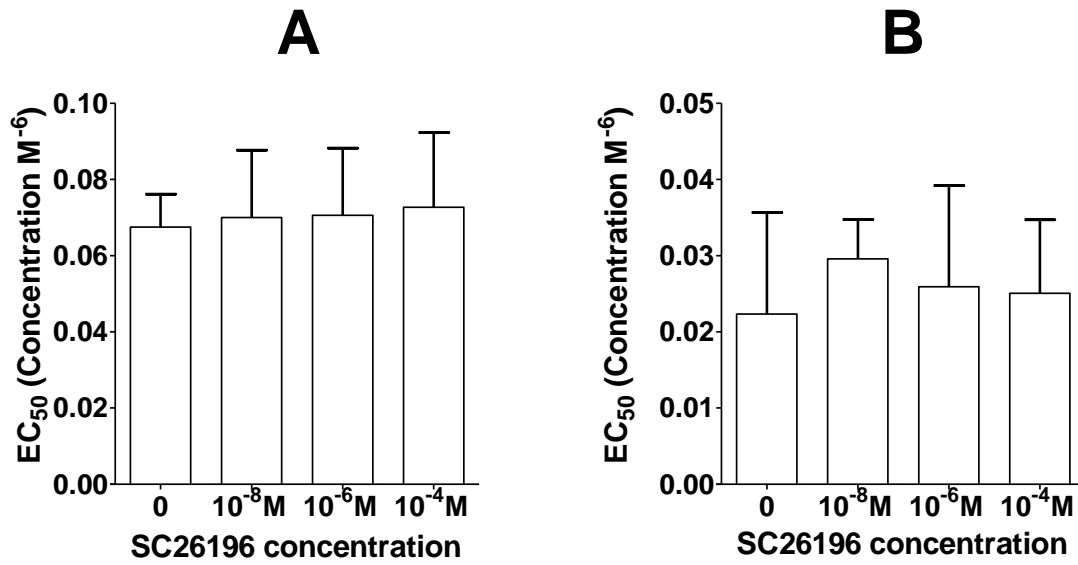

**Figure S2.  $\Delta 6$  and  $\Delta 5$  desaturase activities are not involved in ACh-mediated vaso-relaxation.**

Values are mean  $\pm$  SD (n = 6). (A) ACh +/- SC26196 in aortae; (B) ACh +/- SC26196 in mesenteric arteries. Statistical comparisons of effect of dose of inhibitor were by 1-Way ANOVA with Dunnett's *post hoc* test. Values significantly different from ACh treatment alone are indicated by \*P<0.05, \*\*P<0.01, \*\*\*P<0.001, \*\*\*\*, P<0.0001.
