# Supplementary material for: Vascular Dysfunction Induced in Offspring by Maternal Dietary Fat Involves Altered Arterial Polyunsaturated Fatty Acid Biosynthesis
Source: PLOS journal article supplement (doi:10.1371/journal.pone.0034492), 2012-04-03
Supplement: S6 (10.1371/journal.pone.0034492.s006) [file journal.pone.0034492.s006]

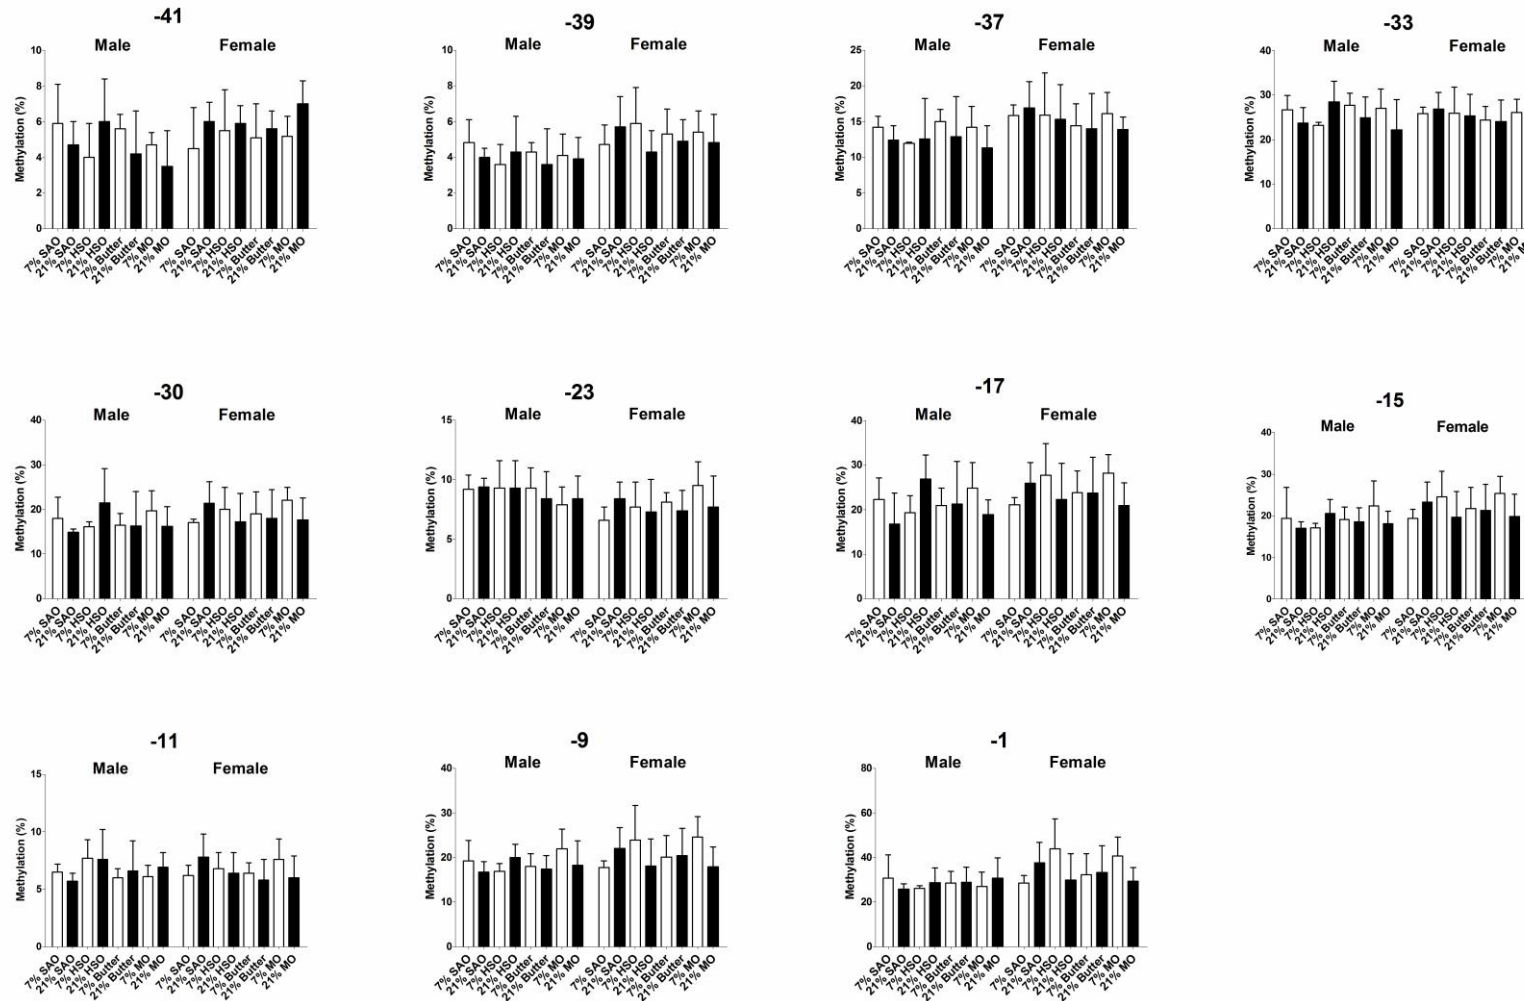

**Figure S6. Methylation status of CpG dinucleotides in the *Fads1* promoter in male and female offspring aortae.** Values are mean  $\pm$  SD (n = 6 / group). Statistical comparisons were by ANOVA with Tukey's *post hoc* analysis. CpG dinucleotides are identified as distance (bp) from the transcription start site. There were no statistically significant differences between groups for these CpG dinucleotides.
