# Supplementary material for: Vascular Dysfunction Induced in Offspring by Maternal Dietary Fat Involves Altered Arterial Polyunsaturated Fatty Acid Biosynthesis
Source: PLOS journal article supplement (doi:10.1371/journal.pone.0034492), 2012-04-03
Supplement: S9 (10.1371/journal.pone.0034492.s009) [file journal.pone.0034492.s009]

**Table S3.** Polyunsaturated fatty acid composition of offspring aorta total lipids on day 77

| Fatty acid concentration (% total fatty acids) |                      |                      |                      |                      |                      |                      |                      |                      |
|------------------------------------------------|----------------------|----------------------|----------------------|----------------------|----------------------|----------------------|----------------------|----------------------|
| Maternal dietary group                         |                      |                      |                      |                      |                      |                      |                      |                      |
|                                                | SAO                  |                      | HSO                  |                      | Butter               |                      | MO                   |                      |
|                                                | 7%                   | 21%                  | 7%                   | 21%                  | 7%                   | 21%                  | 7%                   | 21%                  |
| Male                                           |                      |                      |                      |                      |                      |                      |                      |                      |
| n                                              | 6                    | 6                    | 6                    | 6                    | 6                    | 6                    | 6                    | 6                    |
| 18:2n-6                                        | 13.6±2.9             | 15.1±2.5             | 11.7±2.4             | 11.4±2.0             | 12.2±0.7             | 10.3±2.0             | 9.4±0.9              | 12.5±3.1             |
| 20:3n-6                                        | 0.5±0.2              | 0.3±0.1              | 0.4±0.4              | 0.2±0.8              | 0.3±0.2              | 0.1±0.1              | 0.5±0.3              | 0.2±0.1              |
| 18:3n-3                                        | 0.1±0.5 <sup>a</sup> | 1.0±0.9 <sup>b</sup> | 0.3±0.2 <sup>a</sup> | 1.1±0.3 <sup>b</sup> | 0.2±0.2 <sup>a</sup> | 1.0±0.3 <sup>b</sup> | 0.2±0.1 <sup>b</sup> | 1.2±0.2 <sup>b</sup> |
| 20:5n-3                                        | 0.2±0.1              | 0.2±0.1              | 0.2±0.1              | 0.1±0.8              | 0.2±0.1              | 0.2±0.2              | 0.2±0.1              | 0.2±0.5              |
| 22:5n-3                                        | 0.5±0.1              | 0.4±0.2              | 0.5±0.2              | 0.6±0.9              | 0.3±0.2              | 0.2±0.1              | 0.6±0.2              | 0.4±0.1              |
| Female                                         |                      |                      |                      |                      |                      |                      |                      |                      |
| n                                              | 6                    | 6                    | 6                    | 6                    | 6                    | 6                    | 6                    | 6                    |
| 18:2n-6                                        | 11.1±1.5             | 14.7±2.8             | 9.6±1.4              | 12.5±3.6             | 12.2±0.7             | 12.5±3.6             | 11.0±2.5             | 12.9±3.3             |
| 20:3n-6                                        | 0.7±0.3              | 0.4±0.1              | 0.6±0.2              | 0.3±0.1              | 0.6±0.2              | 0.3±0.1              | 0.7±0.3              | 0.5±0.1              |
| 18:3n-3                                        | 0.2±0.1 <sup>a</sup> | 1.2±0.5 <sup>b</sup> | 0.2±0.1 <sup>a</sup> | 1.2±0.3 <sup>b</sup> | 0.2±0.2 <sup>a</sup> | 1.9±0.3 <sup>b</sup> | 0.1±0.1 <sup>a</sup> | 1.0±0.2 <sup>b</sup> |
| 20:5n-3                                        | 0.1±0.1              | 0.2±0.1              | 0.1±0.0              | 0.1±0.1              | 0.2±0.1              | 0.2±0.1              | 0.3±0.2              | 0.2±0.0              |
| 22:5n-3                                        | 0.4±0.2              | 0.3±0.1              | 0.5±0.2              | 0.6±1.0              | 0.3±0.2              | 0.3±0.1              | 0.9±0.5              | 1.0±0.8              |

Values are mean ± SD proportions of fatty acid in individual maternal plasma lipid classes (n = 6 offspring per group). Different superscripts indicate values which were significantly different ( $P < 0.05$ ) by a general linear model with Tukey's *post hoc* analysis. The proportions of 20:4n-6 and 22:6n-3 are reported in Figure 3.
